# Supplementary material
Source: PubMed Central journal article supplement (PMC1568926)

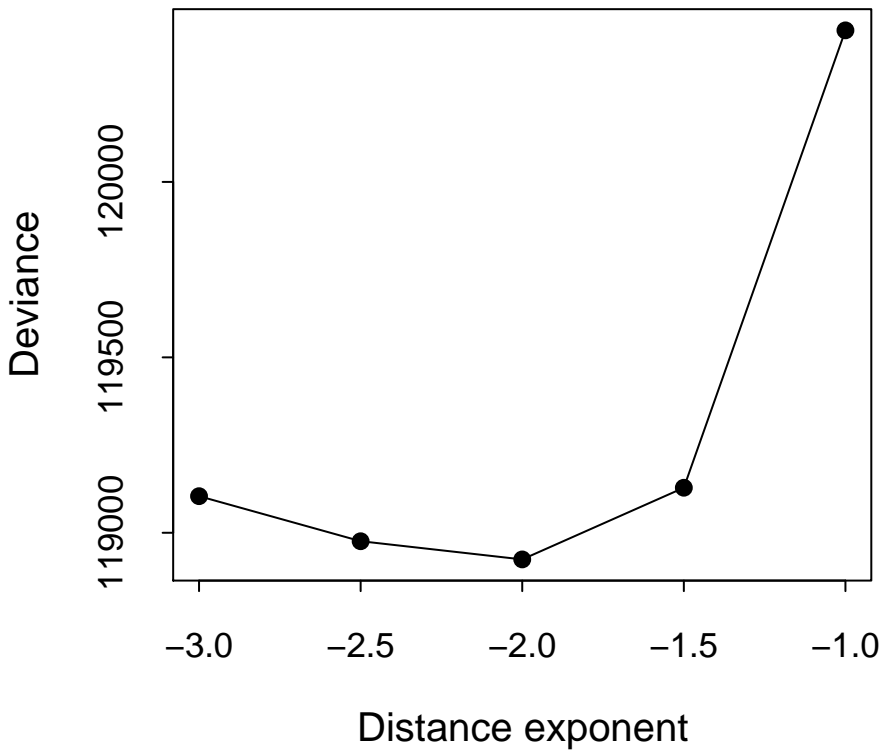

Supplement: pnas_0600599103_1.pdf [file pnas_0600599103_1.pdf]

Predicted change (%)

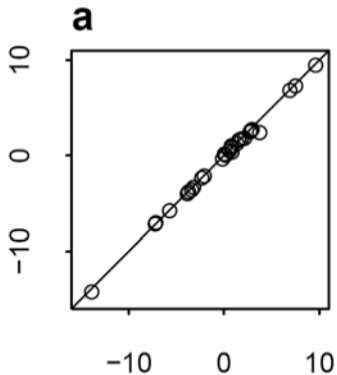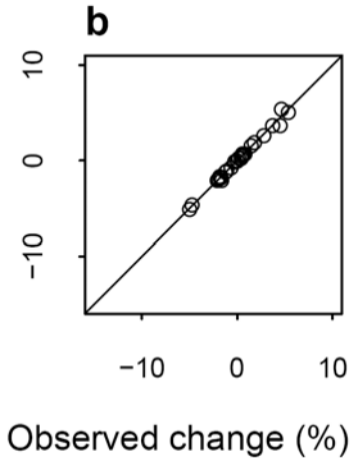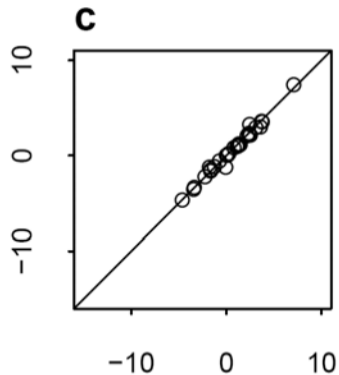

Supplement: pnas_0600599103_2.pdf [file pnas_0600599103_2.pdf]
